# Supplementary material
Source: PubMed Central journal article supplement (PMC6247381)
Supplement: Supp_Fig1.pdf [file Supp_Fig1.pdf]

## Supplementary Data

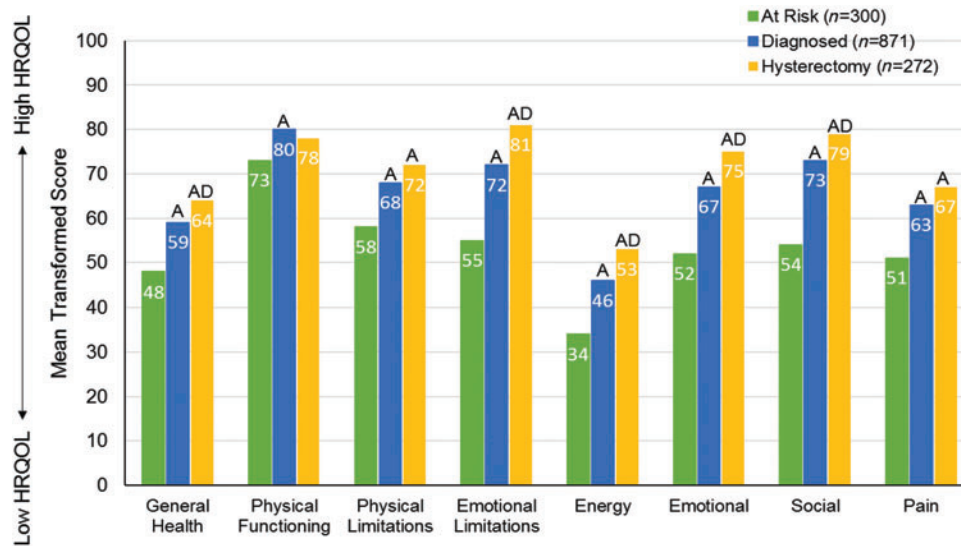

**SUPPLEMENTARY FIG. S1.** Impact on Health-Related Quality of Life (SF-36). Letters denote statistical difference at 90% confidence between cohorts, where A indicates a significant difference versus the at-risk cohort and D indicates a significant difference versus diagnosed cohort. The *n* values reflect the unweighted base; mean values are based on the weighted base. HRQOL, health-related quality of life; SF-36, 36-Item Short Form Survey.
