# Supplementary material
Source: PubMed Central journal article supplement (PMC6247381)
Supplement: Supp_Fig2.pdf [file Supp_Fig2.pdf]

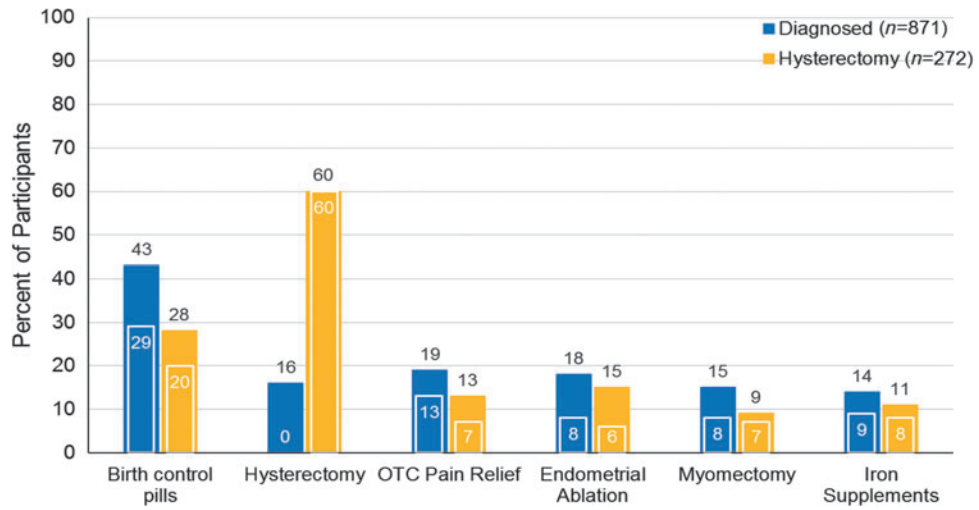

**SUPPLEMENTARY FIG. S2.** First Treatments Discussed and Treatments Prescribed During the Patient Journey. Solid bars represent first treatments or procedures discussed. *Inset* bars represent treatments or procedures prescribed at any time of those women who first discussed a specific treatment. The *n* values reflect the unweighted base; percentages are based on the weighted base.
