# Supplementary material
Source: PubMed Central journal article supplement (PMC6247381)
Supplement: Supp_Fig3.pdf [file Supp_Fig3.pdf]

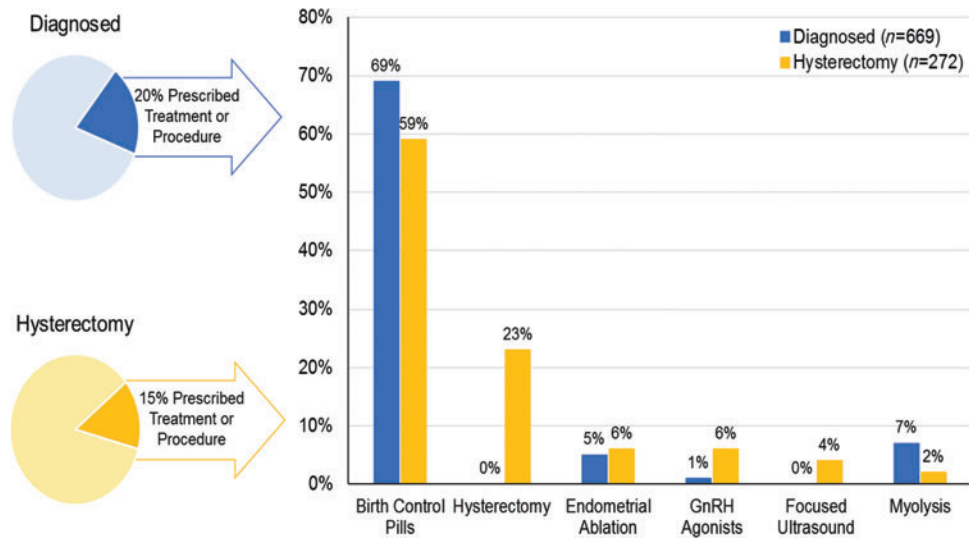

**SUPPLEMENTARY FIG. S3.** First Treatment/Procedure Prescribed During First Discussion. Letters denote statistical difference at 90% confidence between cohorts. Treatment or surgical procedures a healthcare provider prescribed first are listed in descending order for those in  $\geq 5\%$  of the total diagnosed plus hysterectomy cohort prescribed treatment ( $N=941$ ). The  $n$  values reflect the unweighted base; percentages are based on the weighted base.
