# Supplementary material
Source: PubMed Central journal article supplement (PMC6247381)
Supplement: Supp_Fig4.pdf [file Supp_Fig4.pdf]

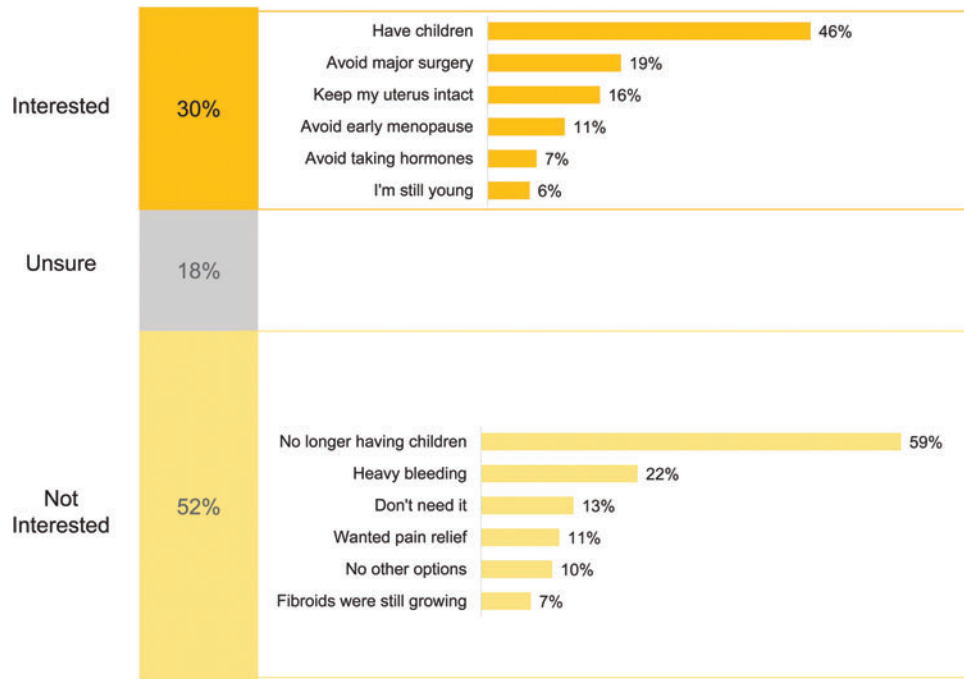

**SUPPLEMENTARY FIG. S4.** Interest in Uterus-Preserving Treatment Options for Women Who Underwent a Hysterectomy ( $n=272$ ). The  $n$  value reflects the unweighted base; percentages are based on the weighted base.
