# Supplementary material
Source: PubMed Central journal article supplement (PMC6247381)
Supplement: Supp_Table1.pdf [file Supp_Table1.pdf]

SUPPLEMENTARY TABLE S1. DEMOGRAPHICS AND BASELINE CHARACTERISTICS

|                                                          | <i>At risk (A)</i><br>n = 300 | <i>Diagnosed (D)</i><br>n = 871 | <i>Hysterectomy (H)</i><br>n = 272 |
|----------------------------------------------------------|-------------------------------|---------------------------------|------------------------------------|
| Age, mean ± SD, years                                    | 33 ± 8.8                      | 41 ± 8.3 <sup>A</sup>           | 51 ± 6.6 <sup>AD</sup>             |
| Age group, %                                             |                               |                                 |                                    |
| 18–24 years                                              | 18                            | 3 <sup>A</sup>                  | 0 <sup>AD</sup>                    |
| 25–34 years                                              | 41                            | 18 <sup>A</sup>                 | 2 <sup>AD</sup>                    |
| 35–44 years                                              | 30                            | 43 <sup>A</sup>                 | 12 <sup>AD</sup>                   |
| 45–54 years                                              | 10                            | 33 <sup>A</sup>                 | 50 <sup>AD</sup>                   |
| 55–64 years                                              | 1                             | 2                               | 36 <sup>AD</sup>                   |
| Race and ethnicity, %                                    |                               |                                 |                                    |
| White                                                    | 40                            | 40                              | 54 <sup>AD</sup>                   |
| Black                                                    | 19                            | 30 <sup>A</sup>                 | 30 <sup>A</sup>                    |
| Hispanic                                                 | 31                            | 22                              | 10 <sup>AD</sup>                   |
| Other                                                    | 4                             | 1 <sup>A</sup>                  | 3                                  |
| ≥2 races, non-Hispanic                                   | 6                             | 7                               | 3 <sup>D</sup>                     |
| Education, bachelor's degree or higher, %                | 16                            | 40 <sup>A</sup>                 | 27 <sup>AD</sup>                   |
| Income, mean ± SD, in thousands (US dollar)              | 50 ± 41                       | 71 ± 45 <sup>A</sup>            | 76 ± 45 <sup>A</sup>               |
| Age of first period, mean ± SD, years                    | 12.1 ± 1.8                    | 12.1 ± 1.7                      | 12.3 ± 1.4                         |
| Comorbidities <sup>a</sup> in ≥5% of total population, % |                               |                                 |                                    |
| Depression                                               | 39                            | 27 <sup>A</sup>                 | 25 <sup>A</sup>                    |
| Anxiety                                                  | 35                            | 26 <sup>A</sup>                 | 18 <sup>AD</sup>                   |
| High blood pressure                                      | 19                            | 21                              | 37 <sup>AD</sup>                   |
| Ovarian cysts                                            | 15                            | 31 <sup>A</sup>                 | 27 <sup>A</sup>                    |
| Obesity                                                  | 21                            | 17                              | 24 <sup>D</sup>                    |
| High cholesterol                                         | 14                            | 13                              | 33 <sup>AD</sup>                   |
| Endometriosis                                            | 4                             | 18 <sup>A</sup>                 | 20 <sup>A</sup>                    |
| Polyps                                                   | 2                             | 13 <sup>A</sup>                 | 17 <sup>A</sup>                    |
| Diabetes/elevated glucose levels                         | 11                            | 7                               | 17 <sup>D</sup>                    |
| Infertility                                              | 3                             | 7 <sup>A</sup>                  | 4                                  |
| Polycystic ovary syndrome                                | 4                             | 7 <sup>A</sup>                  | 3 <sup>D</sup>                     |

<sup>a</sup>Indicates formal diagnosis by a healthcare provider.

Letters denote statistical difference at 90% confidence between cohorts, where A indicates a significant difference versus at-risk cohort and D indicates a significant difference versus diagnosed cohort.

The *n* values reflect the unweighted base; mean values and percentages are based on the weighted base. Percentages have been rounded to the nearest whole number.
