# Supplementary material
Source: PubMed Central journal article supplement (PMC6247381)
Supplement: Supp_Table2.pdf [file Supp_Table2.pdf]

SUPPLEMENTARY TABLE S2. UTERINE FIBROID SYMPTOM AND HEALTH-RELATED  
QUALITY OF LIFE SYMPTOM SEVERITY ITEMS

| <i>Question, % of women<sup>a,b</sup></i>                                   | <i>At risk<br/>n = 300</i> | <i>Diagnosed<br/>n = 871</i> | <i>General population<sup>c</sup><br/>n = 5961</i> |
|-----------------------------------------------------------------------------|----------------------------|------------------------------|----------------------------------------------------|
| Feeling fatigued                                                            | 83%                        | 44%                          | 25%                                                |
| Heavy bleeding during menstrual period                                      | 78%                        | 43%                          | 17%                                                |
| Feeling tightness or pressure in pelvic area                                | 64%                        | 34%                          | 15%                                                |
| Passing blood clots during menstrual period                                 | 62%                        | 38%                          | 17%                                                |
| Frequent urination during daytime hours                                     | 55%                        | 28%                          | 11%                                                |
| Fluctuation in the duration of menstrual period compared to previous cycles | 49%                        | 27%                          | 11%                                                |
| Fluctuation in length of monthly cycle compared to previous cycles          | 45%                        | 26%                          | 11%                                                |
| Frequent nighttime urination                                                | 47%                        | 24%                          | 8%                                                 |

<sup>a</sup>Each question asks how much distress a participant has experienced from each symptom during the previous month; response options ranged from 1 (“Not At All”) to 5 (“A Very Great Deal”).

<sup>b</sup>Values reported indicate percentage of women reporting a 4 (“A Great Deal”) or 5 (“A Very Great Deal”) of distress during past month.

<sup>c</sup>General population represents women who completed the Screener, had not undergone a hysterectomy, and were premenopausal.

No statistical analyses were performed between the cohorts for item-level data. The *n* values reflect the unweighted base; percentages are based on the weighted base.
