# Supplementary material
Source: PubMed Central journal article supplement (PMC6247381)
Supplement: Supp_Table3.pdf [file Supp_Table3.pdf]

SUPPLEMENTARY TABLE S3. ABERDEEN MENORRHAGIA SEVERITY SCALE

|                                                                                                    | <i>At risk</i><br>n = 300 | <i>Diagnosed</i><br>n = 871 | <i>General population</i> <sup>a</sup><br>n = 5961 |
|----------------------------------------------------------------------------------------------------|---------------------------|-----------------------------|----------------------------------------------------|
| Number of bleeding days, mean ± SD                                                                 | 7 ± 4                     | 6 ± 3                       | 5 ± 3                                              |
| Number of heavy bleeding days, mean ± SD                                                           | 4 ± 3                     | 3 ± 2                       | 3 ± 2                                              |
| Number of days from first bleeding day in one cycle to first bleeding day in next cycle, mean ± SD | 17 ± 11                   | 16 ± 12                     | 17 ± 12                                            |
| Required >1 form of protection at the same time, %                                                 | 73                        | 52                          | 42                                                 |
| Using 6+ tampons per heaviest bleeding day, %                                                      | 55                        | 32                          | 16                                                 |
| Using 6+ pads per heaviest bleeding day, %                                                         | 58                        | 34                          | 15                                                 |
| Passed blood clots, %                                                                              | 84                        | 68                          | 75                                                 |
| Confined to bed for at least part of the day, %                                                    | 69                        | 36                          | 16                                                 |
| At least moderately affected by heavy periods, %                                                   | 82                        | 36                          | 15                                                 |
| Severely affected by heavy periods, %                                                              | 33                        | 12                          | 4                                                  |
| Heavy periods prevented all social life, %                                                         | 14                        | 4                           | 1                                                  |

<sup>a</sup>General population represents women who were part of the general population and who completed the Screener portion asked of all women, had not undergone a hysterectomy, and were premenopausal (Fig. 1).

No statistical analyses were performed between the cohorts for item-level data.

The *n* values reflect the unweighted base; mean values and percentages are based on the weighted base.
