# Supplementary material
Source: PubMed Central journal article supplement (PMC6247381)
Supplement: Supp_Table4.pdf [file Supp_Table4.pdf]

SUPPLEMENTARY TABLE S4. 36-ITEM SHORT FORM SURVEY

|                                                                                      | <i>At risk (A)</i><br>n = 300 | <i>Diagnosed (D)</i><br>n = 871 | <i>Hysterectomy (H)</i><br>n = 272 |
|--------------------------------------------------------------------------------------|-------------------------------|---------------------------------|------------------------------------|
| General health, mean ± SD score (5-point scale)                                      | 2.7 ± 1.0                     | 3.2 ± 1.0 <sup>A</sup>          | 3.3 ± 1.0 <sup>A</sup>             |
| % Health much/somewhat better this year                                              | 33                            | 26                              | 35 <sup>D</sup>                    |
| % Health much/somewhat worse this year                                               | 26                            | 21                              | 18                                 |
| % Limited a lot                                                                      |                               |                                 |                                    |
| Vigorous activities                                                                  | 32                            | 22 <sup>A</sup>                 | 21 <sup>A</sup>                    |
| Climbing several flights of stairs                                                   | 18                            | 12                              | 16                                 |
| Walking several blocks                                                               | 13                            | 12                              | 12                                 |
| Walking more than a mile                                                             | 19                            | 11 <sup>A</sup>                 | 15                                 |
| Bending/kneeling/stooping                                                            | 16                            | 9 <sup>A</sup>                  | 13                                 |
| Moderate activities                                                                  | 12                            | 8                               | 7                                  |
| Lifting/carrying groceries                                                           | 10                            | 7                               | 7                                  |
| Walking one block                                                                    | 6                             | 7                               | 6                                  |
| Climbing one flight of stairs                                                        | 8                             | 5                               | 6                                  |
| Bathing or dressing                                                                  | 6                             | 4                               | 2                                  |
| % Agree physical health has...                                                       |                               |                                 |                                    |
| Cut down on time spent on work/activities                                            | 35                            | 25 <sup>A</sup>                 | 23 <sup>A</sup>                    |
| Accomplished less                                                                    | 53                            | 41 <sup>A</sup>                 | 33 <sup>A</sup>                    |
| Limited kind of work/activities                                                      | 38                            | 31                              | 27 <sup>A</sup>                    |
| Difficulty performing work/activities                                                | 41                            | 30 <sup>A</sup>                 | 29 <sup>A</sup>                    |
| % Agree emotional health has...                                                      |                               |                                 |                                    |
| Cut down on time spent on work/activities                                            | 42                            | 27 <sup>A</sup>                 | 17 <sup>AD</sup>                   |
| Accomplished less                                                                    | 54                            | 37 <sup>A</sup>                 | 26 <sup>AD</sup>                   |
| Did work/activities less carefully                                                   | 39                            | 20 <sup>A</sup>                 | 15 <sup>A</sup>                    |
| % Feel a bit good/most of the time...                                                |                               |                                 |                                    |
| Happy                                                                                | 50                            | 62 <sup>A</sup>                 | 77 <sup>AD</sup>                   |
| Calm/peaceful                                                                        | 34                            | 52 <sup>A</sup>                 | 68 <sup>AD</sup>                   |
| Tired                                                                                | 70                            | 48 <sup>A</sup>                 | 40 <sup>AD</sup>                   |
| Worn out                                                                             | 65                            | 37 <sup>A</sup>                 | 33 <sup>A</sup>                    |
| Full of energy                                                                       | 25                            | 36 <sup>A</sup>                 | 50 <sup>AD</sup>                   |
| Full of pep                                                                          | 20                            | 34 <sup>A</sup>                 | 50 <sup>AD</sup>                   |
| Nervous                                                                              | 44                            | 23 <sup>A</sup>                 | 12 <sup>AD</sup>                   |
| Downhearted/blue                                                                     | 35                            | 16 <sup>A</sup>                 | 10 <sup>AD</sup>                   |
| Down in the dumps                                                                    | 38                            | 15 <sup>A</sup>                 | 8 <sup>AD</sup>                    |
| % Physical/emotional problems interfered with social activities all/most of the time | 30                            | 14 <sup>A</sup>                 | 10 <sup>A</sup>                    |
| % Agree mostly/definitely true                                                       |                               |                                 |                                    |
| Get sick easier than others                                                          | 36                            | 19 <sup>A</sup>                 | 11 <sup>AD</sup>                   |
| As healthy as anybody else                                                           | 27                            | 50 <sup>A</sup>                 | 59 <sup>AD</sup>                   |
| Expect my health to worsen                                                           | 21                            | 14 <sup>A</sup>                 | 17                                 |
| Have excellent health                                                                | 31                            | 48 <sup>A</sup>                 | 57 <sup>AD</sup>                   |

Letters denote statistical difference at 90% confidence between cohorts, where A indicates a significant difference versus at-risk cohort and D indicates a significant difference versus diagnosed cohort.

The *n* values reflect the unweighted base; mean values and percentages are based on the weighted base. Percentages have been rounded to the nearest whole number.
