# Supplementary material
Source: PubMed Central journal article supplement (PMC6247381)
Supplement: Supp_Table5.pdf [file Supp_Table5.pdf]

SUPPLEMENTARY TABLE S5. WORK PRODUCTIVITY AND ACTIVITY IMPAIRMENT

| <i>WPAI:SHP</i> <sup>a,b</sup>                                  | <i>At risk</i><br>n = 153 <sup>c</sup> | <i>Diagnosed</i><br>n = 586 <sup>c</sup> | <i>Hysterectomy</i><br>n = 182 <sup>c</sup> |
|-----------------------------------------------------------------|----------------------------------------|------------------------------------------|---------------------------------------------|
| Absenteeism, %                                                  |                                        |                                          |                                             |
| Monthly work time missed due to fibroids/heavy bleeding         | 4.80                                   | 3.07                                     | 6.11                                        |
| Presenteeism, %                                                 |                                        |                                          |                                             |
| Monthly impairment while working due to fibroids/heavy bleeding | 61.4                                   | 25.3                                     | 44.5                                        |
| Overall work impairment, %                                      |                                        |                                          |                                             |
| Overall monthly work impairment due to fibroids/heavy bleeding  | 63.3                                   | 27.6                                     | 47.9                                        |
| Activity impairment, %                                          |                                        |                                          |                                             |
| Monthly activity impairment due to fibroids/heavy bleeding      | 63.3                                   | 28.6                                     | 52.7                                        |

<sup>a</sup>WPAI:SHP analyses based on responses to WPAI questions asked of all women that were employed and working for pay. Calculations for absenteeism, presenteeism, overall work impairment, and activity impairment are detailed by Reilly Associates. Available at: [www.reillyassociates.net/WPAI\\_Scoring.html](http://www.reillyassociates.net/WPAI_Scoring.html) Accessed January 29, 2018.

<sup>b</sup>The hysterectomy cohort was asked to respond to the WPAI questions thinking back to an average month when their uterine fibroids were at their worst (before their hysterectomy).

<sup>c</sup>N values shown for responses to WPAI questions 2, 3, and 4; questions 5 and 6 had the following N values: at risk, n = 149; diagnosed, n = 558; hysterectomy, n = 171.

No statistical analyses were performed between the cohorts.

The n values reflect the unweighted base; mean values (used to calculate WPAI:SHP percentages) are based on the weighted base. WPAI:SHP, Work Productivity and Activity Impairment Questionnaire: Specific Health Problem.
